# Supplementary figures and images for: Multifunctional non-viral gene vectors with enhanced stability, improved cellular and nuclear uptake capability, and increased transfection efficiency
Source: Royal Society of Chemistry journal article supplement (doi:10.1039/c4nr02395a), 2014-01-01

# Supporting Information

Figure S1. <sup>1</sup>H-NMR of PGA-g-mPEG (A) and PGA-g-PEG-mTAT (B) conjugates.

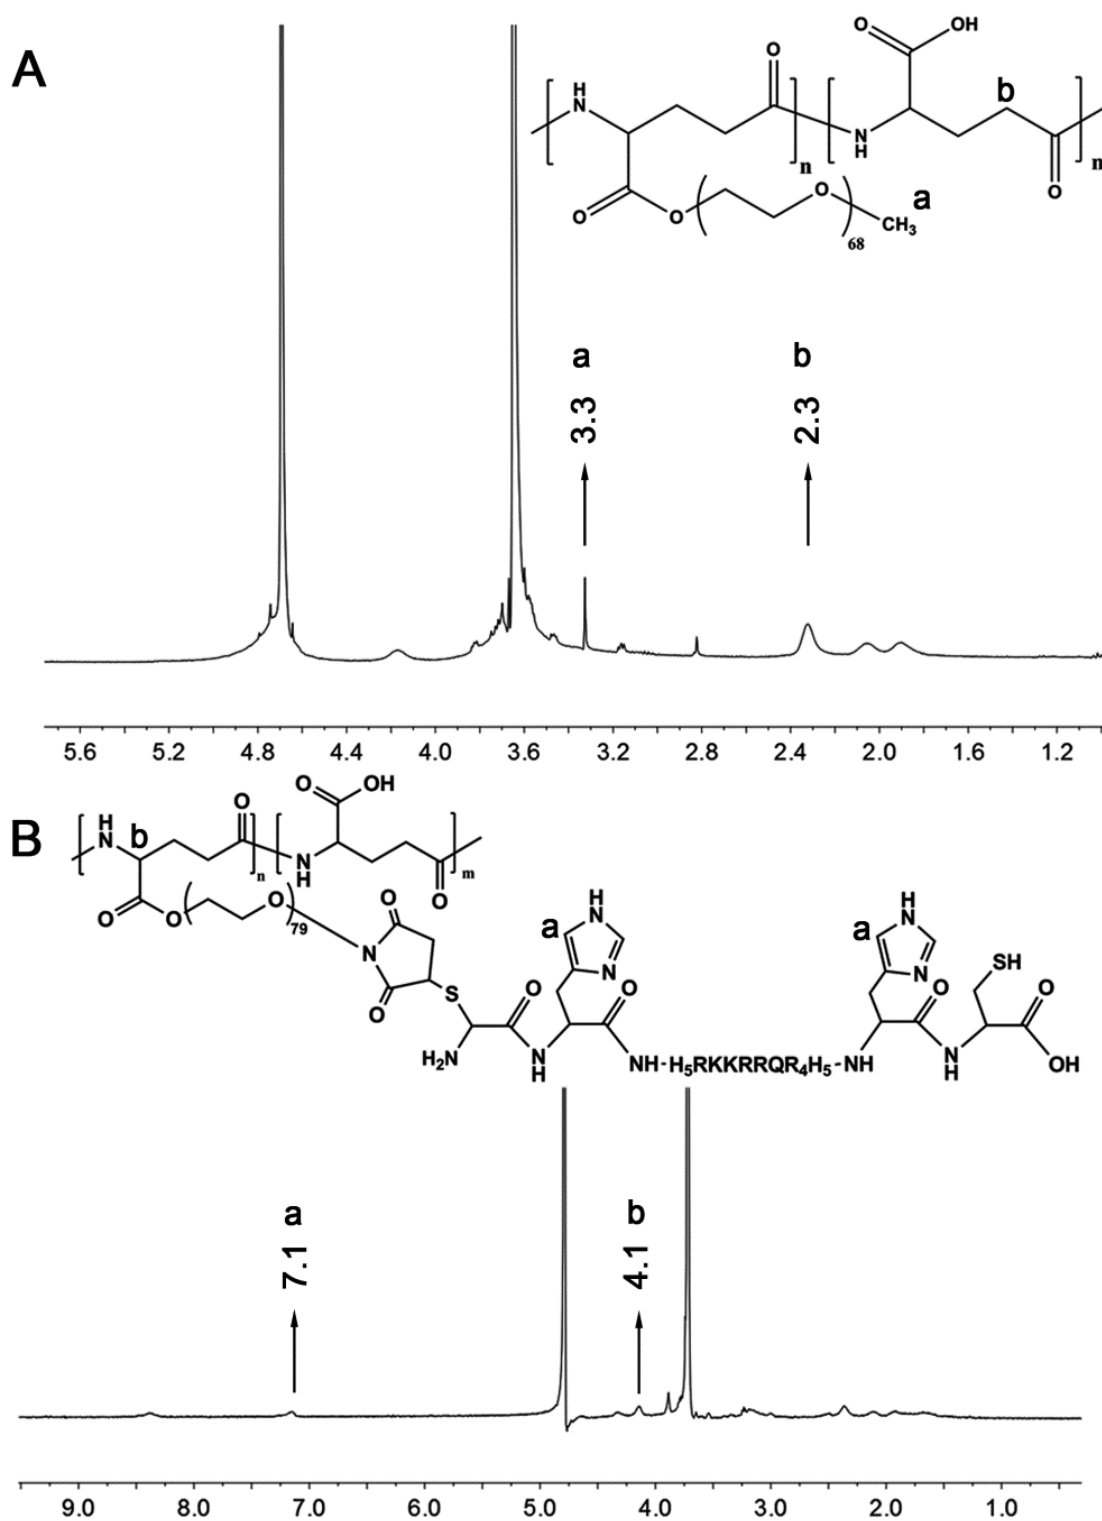

Supplement: c4nr02395a1.pdf [file c4nr02395a1.pdf]
